# Supplementary material for: Computational Interaction Analysis of Sirex noctilio Odorant-Binding Protein (SnocOBP7) Combined with Female Sex Pheromones and Symbiotic Fungal Volatiles
Source: MDPI journal article supplement (doi:10.3390/agronomy11122461), 2021-12-02
Supplement: s1 [file s1]

Archive with 1 entries (1 files):
- agronomy-1470052-supplementary.pdf
