# Supplementary material for: Computational Interaction Analysis of Sirex noctilio Odorant-Binding Protein (SnocOBP7) Combined with Female Sex Pheromones and Symbiotic Fungal Volatiles
Source: MDPI journal article supplement (doi:10.3390/agronomy11122461), 2021-12-02
Supplement: s1 [file s1 › agronomy-1470052-supplementary.pdf]

## Supplementary files

**Table S1.** Cluster analysis of the SnocOBP7-ligand complexes based on the MD simulations trajectories.

| System | Cluster | Number of frames | Occurrence (%) |
|--------|---------|------------------|----------------|
| S1     | 1       | 115              | 38.21          |
|        | 2       | 78               | 25.91          |
|        | 3       | 45               | 14.95          |
|        | 4       | 26               | 8.64           |
|        | 5       | 17               | 5.65           |
|        | 6       | 10               | 3.32           |
|        | 7       | 6                | 1.99           |
|        | 8       | 3                | 1.00           |
|        | 9       | 1                | 0.33           |
| S2     | 1       | 119              | 39.53          |
|        | 2       | 74               | 24.58          |
|        | 3       | 44               | 14.62          |
|        | 4       | 27               | 8.97           |
|        | 5       | 19               | 6.31           |
|        | 6       | 10               | 3.32           |
|        | 7       | 6                | 1.99           |
|        | 8       | 2                | 0.66           |
| S10    | 1       | 199              | 66.11          |
|        | 2       | 60               | 19.93          |
|        | 3       | 26               | 8.64           |
|        | 4       | 13               | 4.32           |
|        | 5       | 3                | 1.00           |

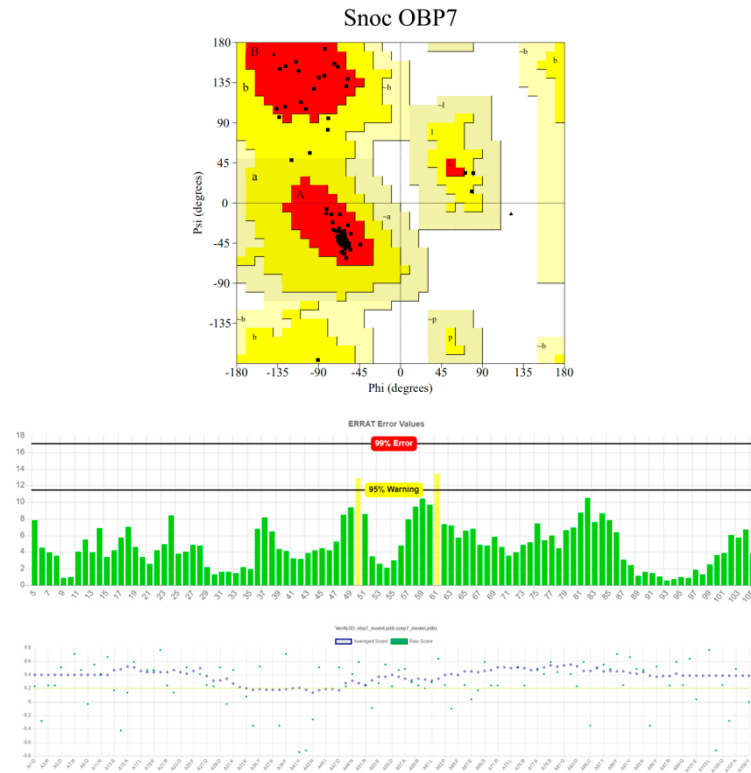

**Figure S1.** Ramachandran plot, ERRAT and Verify\_3D result of SnocOBP7 model. (A): Ramachandran plot; (B): ERRAT; (C): Verify\_3D.

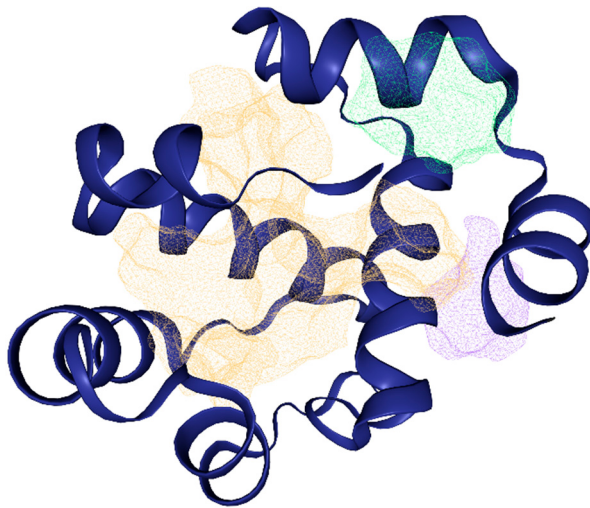

**Figure S2.** Predicted binding pocket of SnocOBP7.

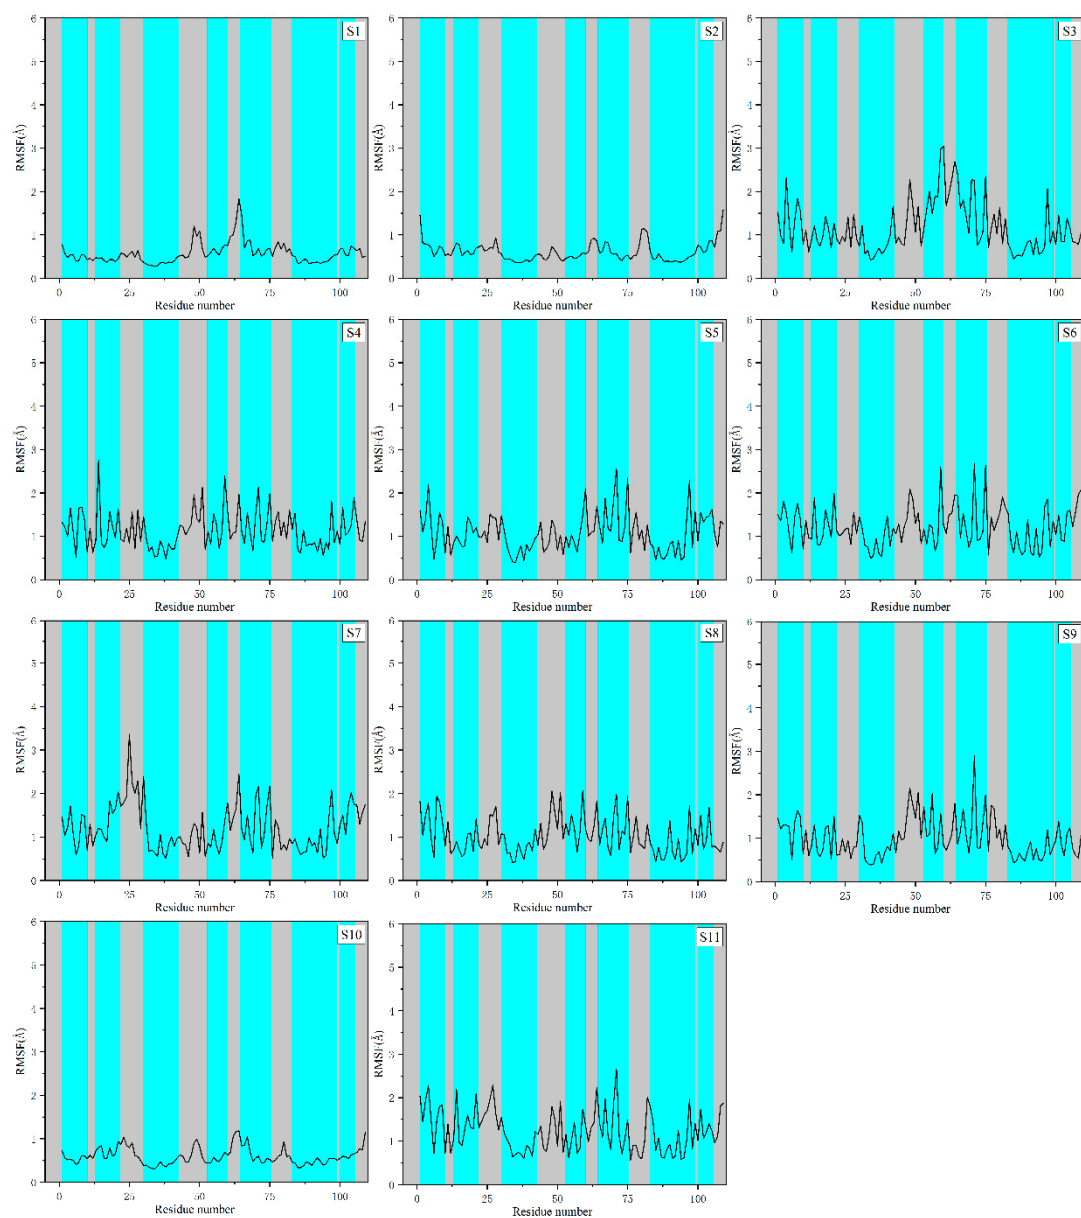

**Figure S3.** The root-mean-square fluctuation (RMSF) curve of the 11 systems. The secondary structure of the initial conformation of SnocOBP7 was calculated by DSSP. The background color determines the different structure types: the gray area represents the loop, and the blue represents the alpha helix. Refer to Table 1 for system specific information.
